# Supplementary material
Source: Springer Nature journal article supplement (https://www.springermedizin.de/resource/supplementary/12890_2013_518_MOESM1_ESM.pdf/9505666)
Supplement: MOESM1 [file 9505666]

**1553 COPD Clinical records**

↓ 1010 Do not Follow inclusion criteria

**543 Follow inclusion criteria**

↓ 397 Excluded →

**146 Participants**

Written Consent ↓ Randomization

128 unreachable  
113 refuse to participate  
58 disable  
39 non current, scheduled or measurable treatment  
20 deceased  
18 do not attend appointment  
10 severe health problems  
8 unable to attend  
3 Primary care center change

**Inclusion Visit**

- Sociodemographic profile
- Clinical characteristic
- Social support
- Family Support
- Quality of life
- Prescribed treatment
- Treatment adherence

**Control Group**  
74 patients

**Intervention Group**  
72 patients

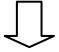

**Visit 1** (63 patients)  
(3 months after inclusion)  
• Variables changes  
• Treatment adherence

Group session ↓

**Intervention**  
Motivational aspects  
Cognitive aspects  
Skills development

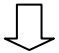

**Visit 2** (42 patients)  
(6 months after inclusion)  
• Variables changes  
• Treatment adherence

**Visit 1** (51 patients)  
(3 months after intervention)  
• Variables changes  
• Treatment adherence  
• Intervention reinforcement

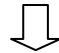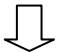

**Visit 3** (57 patients)  
(12 months after inclusion)  
• Sociodemographic profile  
• Clinical characteristic  
• Social support  
• Family support  
• Quality of life  
• Variables changes  
• Treatment adherence

**Visit 2** (47 patients)  
(6 months after intervention)  
• Variables changes  
• Treatment adherence  
• Intervention reinforcement

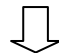

**Visit 3** (47 patients)  
(12 months after intervention)  
• Sociodemographic profile  
• Clinical characteristic  
• Social support  
• Family support  
• Quality of life  
• Variables changes  
• Treatment adherence
